# Supplementary material
Source: publisher site journal article supplement (http://www.spandidos-publications.com/2709/downloadSupplementary)

Figure S1. NLRP3, IL-1 $\beta$ , IL-18, ASC and cleaved caspase-1 protein expression levels in sepsis model mice. Protein expression levels were measured via western blotting. \* $P < 0.05$ , \*\* $P < 0.01$  and \*\*\* $P < 0.001$  vs. Sham. NLRP3, nucleotide-binding oligomerization domain-like receptor protein 3; ASC, apoptosis-associated speck-like protein containing a CARD.

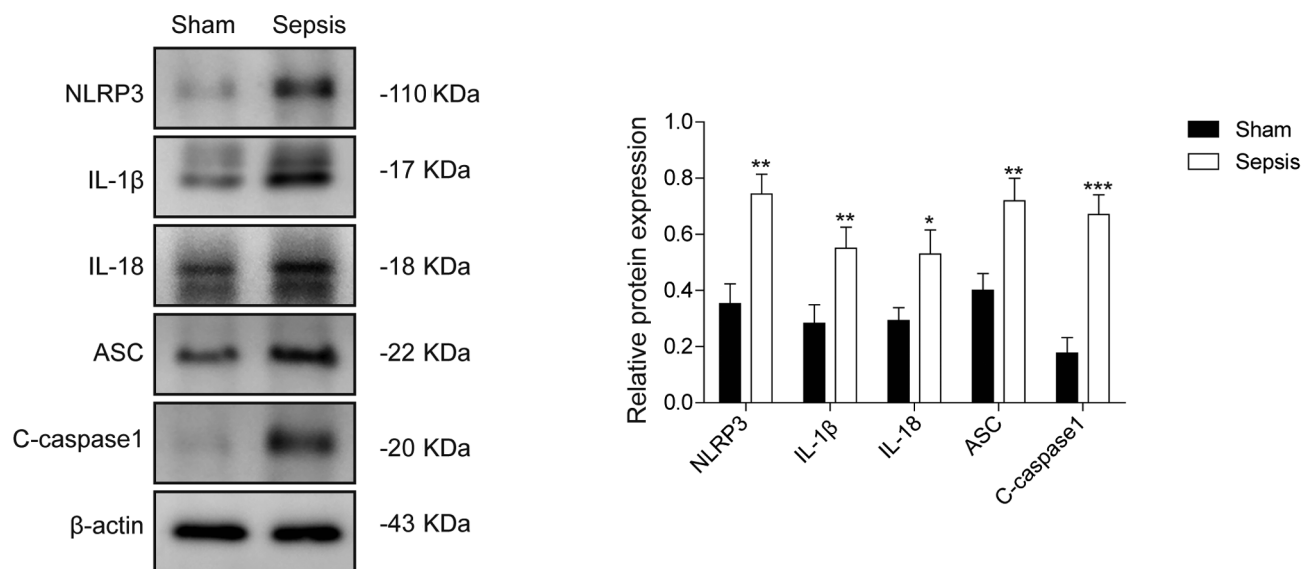

Figure S2. C-GSDMD, C-GSDME and caspase-11 protein expression levels in LPS-induced HK-2 cells. Protein expression levels were measured via western blotting. \*\*P<0.01 vs. control. C, cleaved; GSDMD, gasdermin D; GSDME, gasdermin E; LPS, lipopolysaccharide.

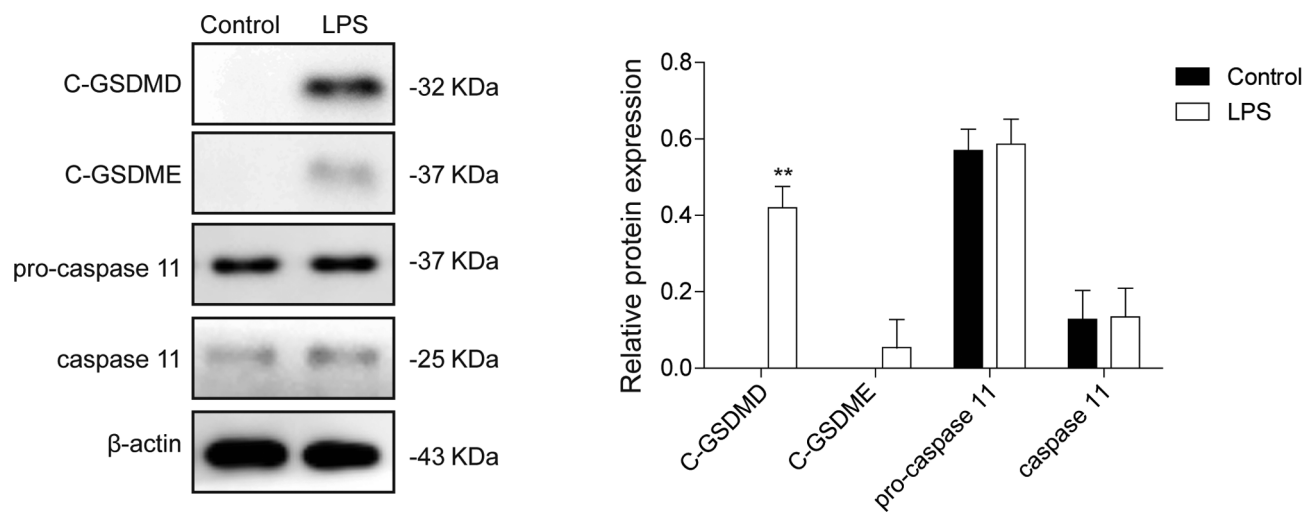

Figure S3. PVT1 overexpression promotes HK-2 cell pyroptosis. (A) Transfection efficiency of PVT1 overexpression. (B) Cell pyroptosis was detected via flow cytometry. \*\* $P < 0.01$  and \*\*\* $P < 0.001$ . PVT1, plasmacytoma variant translocation 1; NC, negative control.

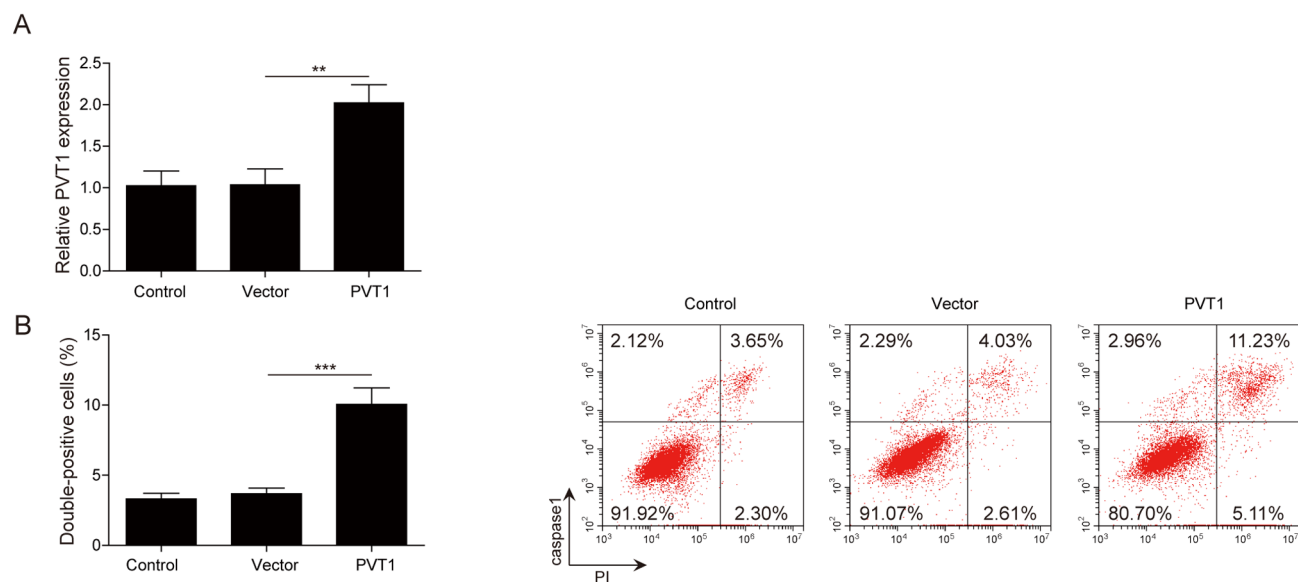

Figure S4. Transfection efficiency of siNLRP3. Reverse transcription-quantitative PCR was performed to assess the transfection efficiency of siNLRP3. \*\* $P < 0.01$ . si, small interfering RNA; NLRP3, nucleotide-binding oligomerization domain-like receptor protein 3; NC, negative control.

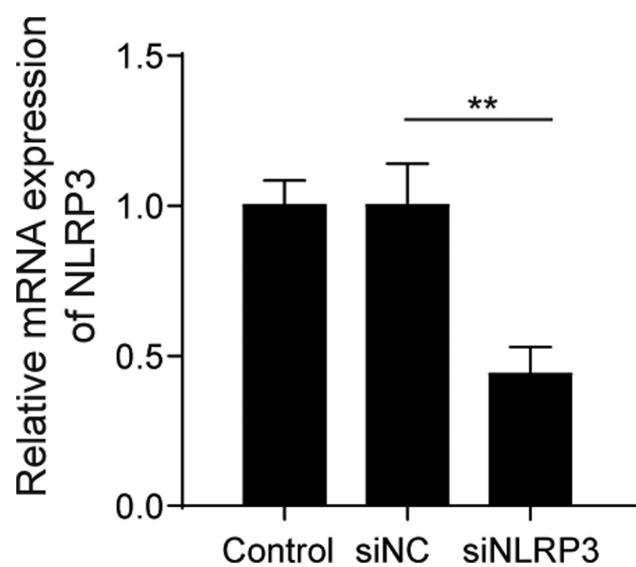

Supplement: Supplementary file 1 [file downloadSupplementary]
